# Supplementary material for: Lock, Linear Lambda-Paramodulation in Operator Fuzzy Logic.
Source: publisher site journal article supplement (doi:10.18632/aging.204158), 1989-01-01
Supplement: Supplementary file [file aging-v14i13-204158-supplementary-material-SD1.pdf]

**SUPPLEMENTARY FIGURES**

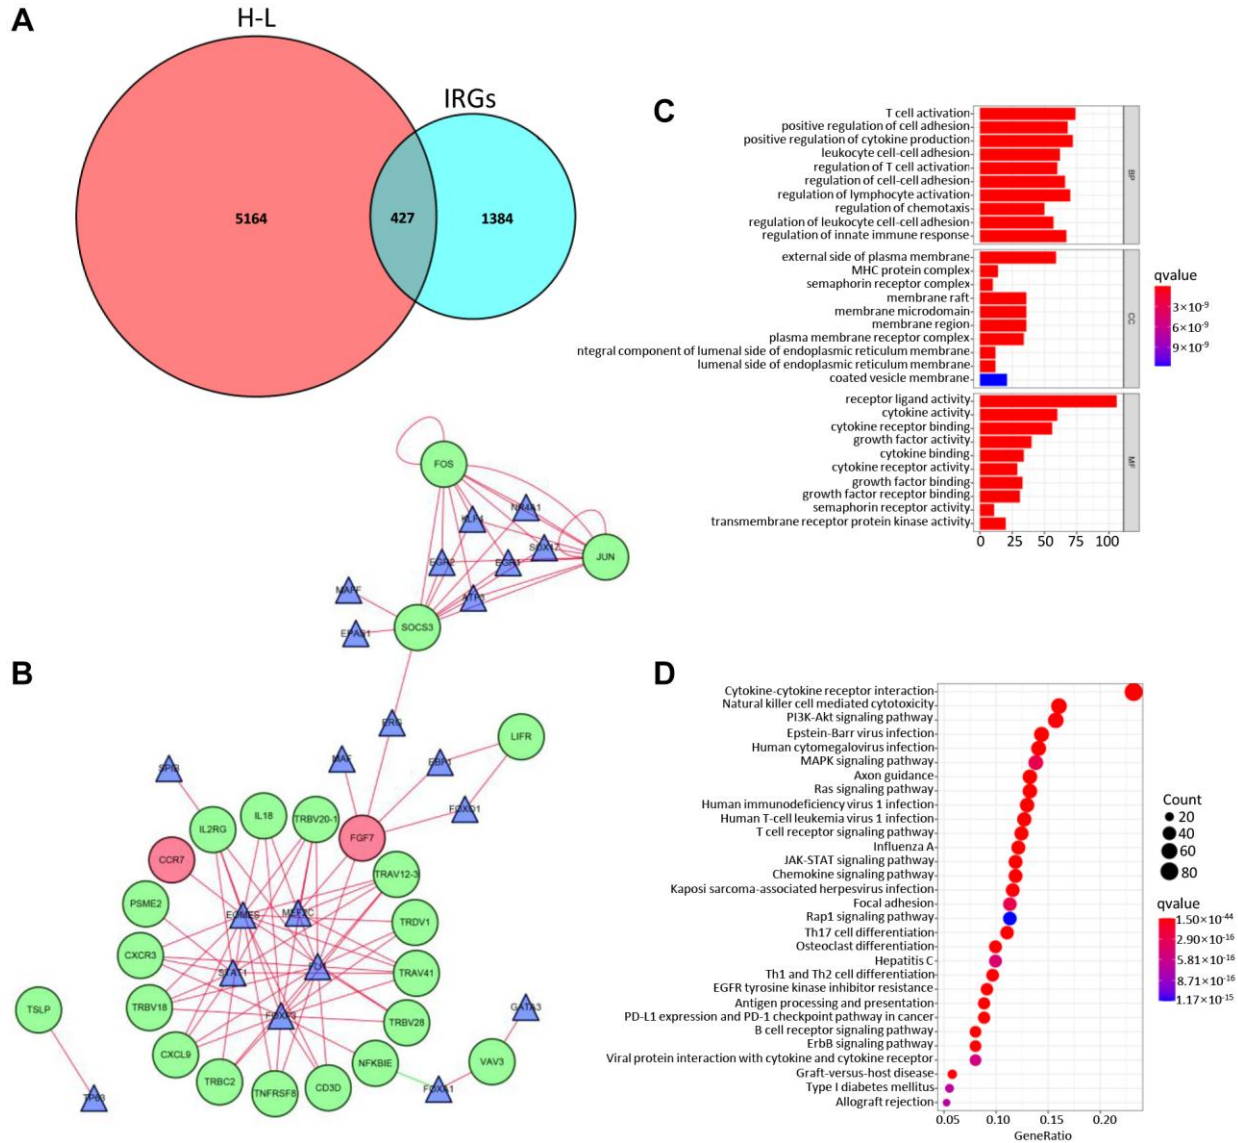

**Supplementary Figure 1.** The 427 immune-related differential genes in high- and low-risk groups were shown in Venn diagram (A). The regulatory network of transcription factors (TFs) and (IRGs). Regulatory networks based on survival-related TFs and IRGs in breast cancer. Pink circles indicated high-risk genes, green circles indicate low-risk genes, and purple triangles indicated transcription factors in the regulatory network (B). GO functional annotation (C) and KEGG (D) enrichment analysis were performed for the IRGs.

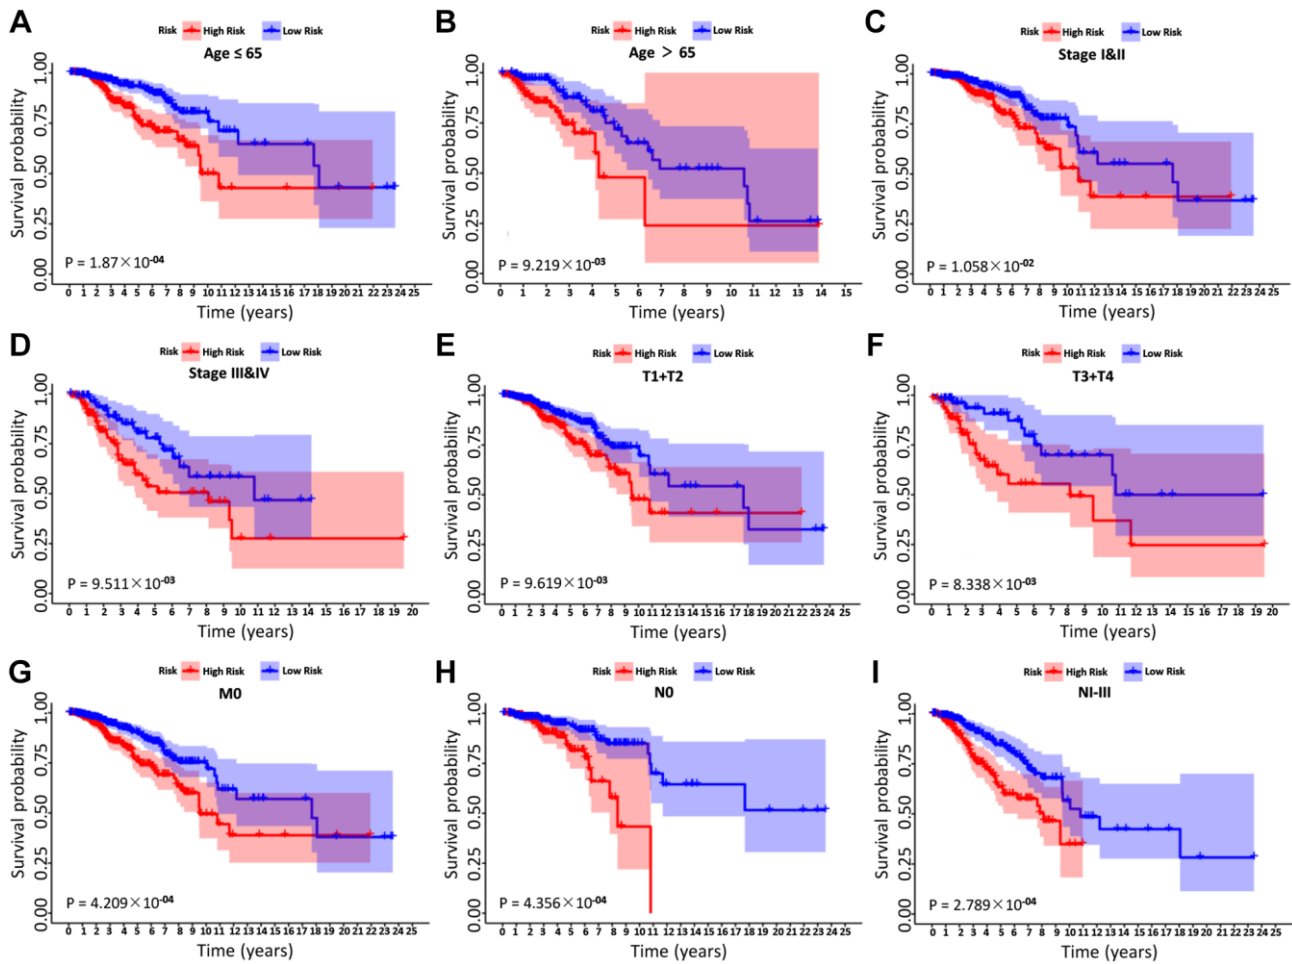

**Supplementary Figure 2. The OS differences under different classification between the high-risk group and the low-risk group. Age (A, B), stage (C, D), T stage (E, F), distant metastasis (G) and lymph node metastasis (H, I).**

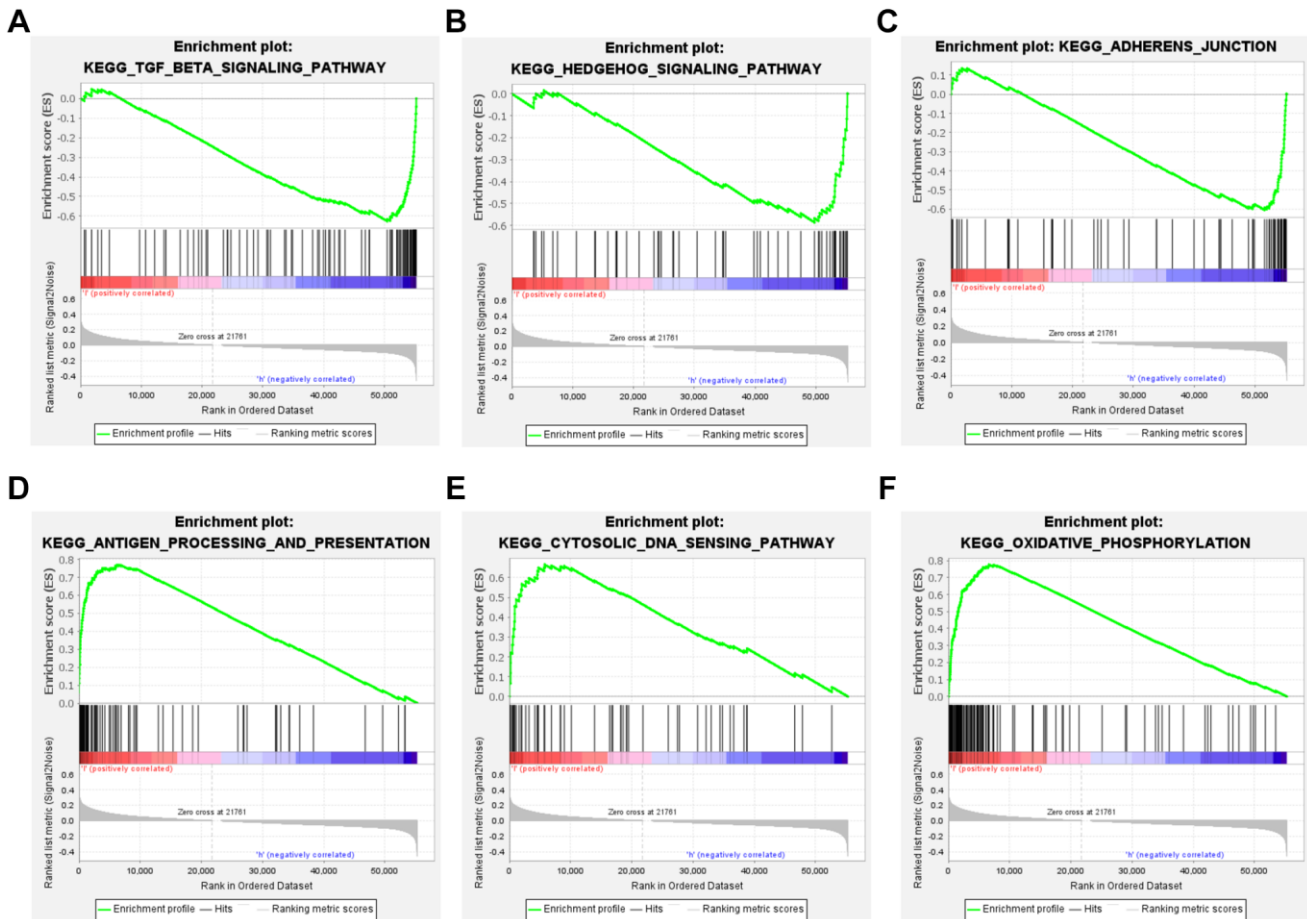

**Supplementary Figure 3. KEGG pathway analysis from gene set enrichment analysis (GSEA).** GSEA results showing (A), Hedgehog signaling pathway (B), Adherens junction enriched in the low-risk group (C), while Antigen processing and presentation (D), Cytosolic DNA sensing pathway (E), Oxidative phosphorylation were enriched in the high-risk group (F).
